# Supplementary material for: Correlating experimental electrochemistry and theoretical calculations in 2′-hydroxy chalcones: the role of the intramolecular hydrogen bond
Source: Royal Society of Chemistry journal article supplement (doi:10.1039/c5ra10140a), 2015-01-01
Supplement: c5ra10140a1.pdf [file c5ra10140a1.pdf]

## Electronic Supporting Information

### Correlating Experimental Electrochemistry and Theoretical Calculations in 2'-Hydroxy Chalcones Derivatives: The Role of Intramolecular Hydrogen Bond

Maximiliano Martínez-Cifuentes<sup>[a]\*</sup>, Ricardo Salazar<sup>[b]</sup>, Carlos A. Escobar<sup>[c]</sup>, Boris E.  
Weiss-López<sup>[d]</sup>, Leonardo S. Santos<sup>[a]</sup>, Ramiro Araya-Maturana<sup>[e,f]\*</sup>

[a] Laboratorio de Síntesis Asimétrica, Instituto de Química de los Recursos Naturales, Universidad de Talca, Talca, casilla 747, Chile. [mmartinez@ug.uchile.cl](mailto:mmartinez@ug.uchile.cl)

[b] Departamento de Ciencias del Ambiente, Facultad de Química y Biología, Universidad de Santiago de Chile, USACh, Casilla 40, Correo 33, Santiago, Chile

[c] Departamento de Ciencias Químicas Universidad Andres Bello, Av. República 275, Santiago, Chile.

[d] Departamento de Química, Facultad de Ciencias, Universidad de Chile, Casilla 653, Santiago, Chile.

[e] Departamento de Química Orgánica y Fisicoquímica, Facultad de Ciencias Químicas Y Farmacéuticas, Universidad de Chile, Casilla 233, Santiago 1, Chile. [raraya@ciq.uchile.cl](mailto:raraya@ciq.uchile.cl)

[f] Instituto de Química de los Recursos Naturales, Universidad de Talca, Talca, casilla 747, Chile.

| Table of contents:                                | Page |
|---------------------------------------------------|------|
| Figure s1                                         | 2    |
| Figure s2                                         | 3    |
| Optimized geometries and energies for all species | 4-19 |

**Figure s1.** SOMO (singly occupied molecular orbital) for the anion radicals of chalcones 1-6.

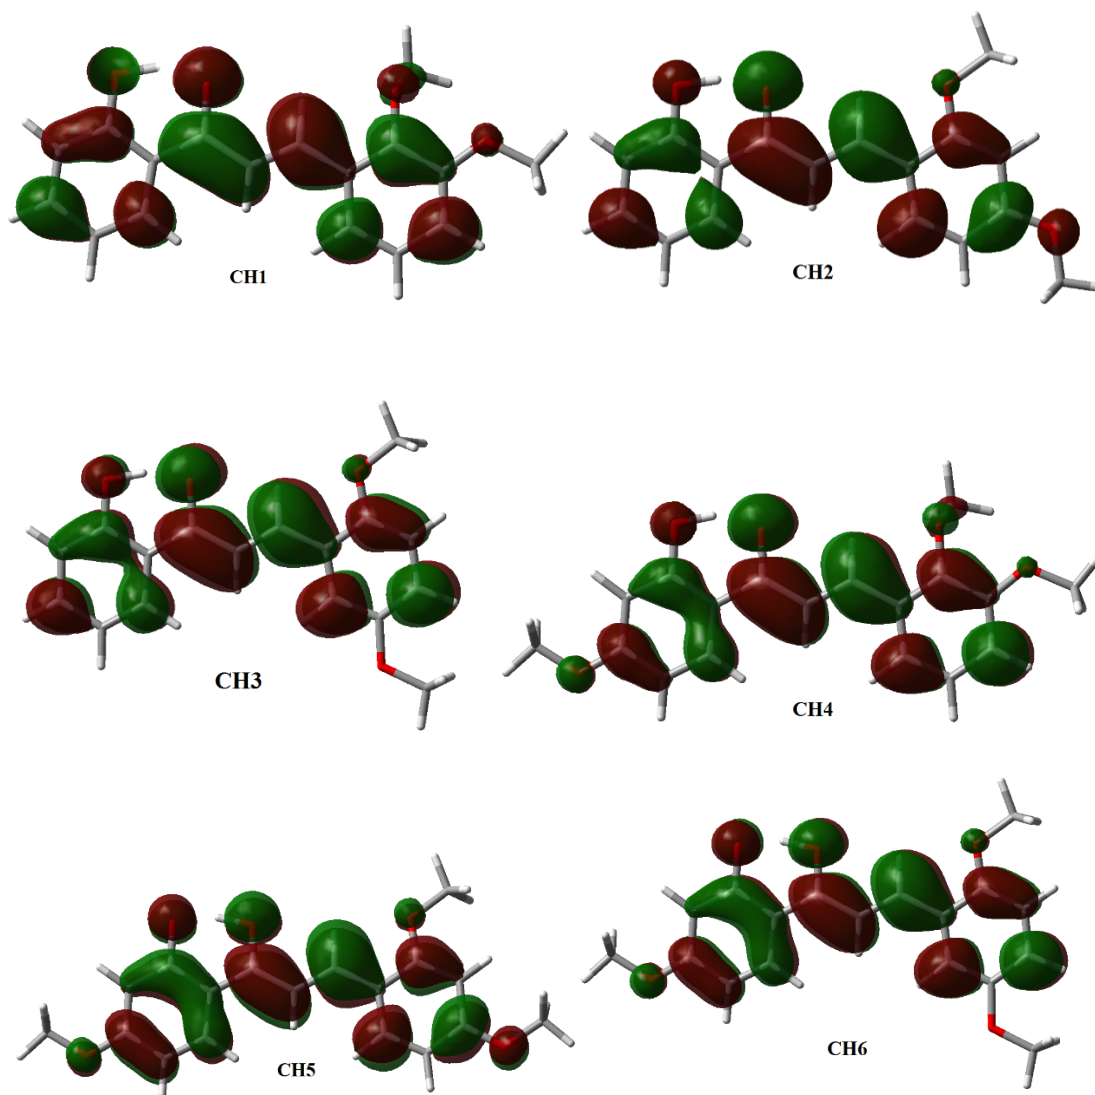

**Figure s2.** SOMO for the vertical attachment electron of anion radicals of chalcones 1-6.

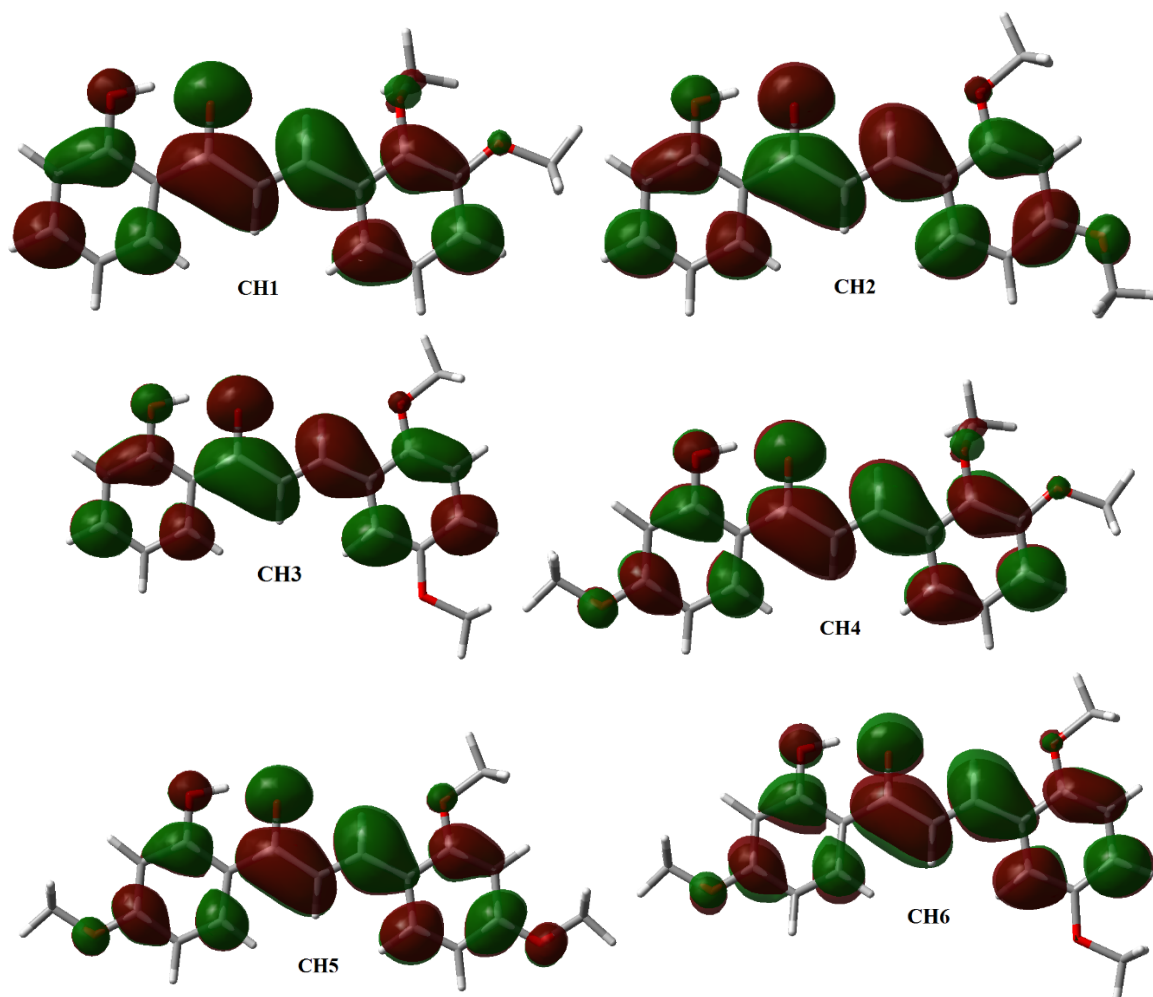

## Optimized geometries and energies.

DFT B3P86/6-31+G(d,p) level, C-PCM(DMSO)

Neutral species

Ch1 (neutral)

|   |           |           |           |
|---|-----------|-----------|-----------|
| C | -5.846614 | -0.238385 | 0.009902  |
| C | -6.017401 | 1.128238  | 0.162995  |
| C | -4.909088 | 1.985387  | 0.228024  |
| C | -3.632945 | 1.457253  | 0.137911  |
| C | -3.417473 | 0.071397  | -0.018404 |
| C | -4.557080 | -0.779366 | -0.081720 |
| H | -6.698108 | -0.914318 | -0.041658 |
| H | -7.024763 | 1.536695  | 0.233209  |
| H | -5.048526 | 3.057388  | 0.348066  |
| H | -2.786881 | 2.137312  | 0.191008  |
| C | -2.078801 | -0.525723 | -0.116029 |
| C | -0.882223 | 0.315037  | -0.057385 |
| C | 0.346974  | -0.242135 | -0.130366 |
| C | 1.622038  | 0.454664  | -0.083814 |
| C | 2.803364  | -0.309360 | -0.129098 |
| C | 1.725953  | 1.858492  | 0.001827  |
| C | 4.066695  | 0.318160  | -0.096519 |
| C | 2.967315  | 2.466532  | 0.049672  |
| H | 0.827144  | 2.470053  | 0.030630  |
| C | 4.142132  | 1.706265  | 0.001986  |
| H | 3.040913  | 3.550199  | 0.119033  |
| H | 5.102450  | 2.211876  | 0.030324  |
| H | -1.002413 | 1.388635  | 0.049192  |
| H | 0.399996  | -1.322601 | -0.235250 |
| O | -1.966366 | -1.771006 | -0.251198 |
| O | -4.437960 | -2.105483 | -0.228041 |
| H | -3.447966 | -2.284307 | -0.271378 |
| O | 2.725499  | -1.666600 | -0.271155 |
| O | 5.136934  | -0.510345 | -0.179214 |
| C | 3.089590  | -2.422777 | 0.890753  |
| H | 4.121646  | -2.214058 | 1.183866  |

|   |          |           |           |
|---|----------|-----------|-----------|
| H | 2.408737 | -2.195345 | 1.718930  |
| H | 2.989165 | -3.472759 | 0.612913  |
| C | 6.433553 | 0.070172  | -0.131274 |
| H | 6.591678 | 0.754136  | -0.972768 |
| H | 6.592645 | 0.603626  | 0.812696  |
| H | 7.133513 | -0.762164 | -0.202723 |

Neutral

E = -961.074457971 Hartree

Zero-point correction = 0.293110 (Hartree/Particle)

Radical anion optimized at neutral geometry

E = -961.203719525 Hartree

Zero-point correction = 0.290620 (Hartree/Particle)

Ch2 (neutral)

|   |           |           |           |
|---|-----------|-----------|-----------|
| C | -5.874329 | -0.244229 | 0.005644  |
| C | -5.859336 | -1.630012 | 0.014770  |
| C | -4.645059 | -2.331507 | 0.016194  |
| C | -3.451873 | -1.629026 | 0.008235  |
| C | -3.425329 | -0.218718 | -0.001460 |
| C | -4.669677 | 0.472137  | -0.002487 |
| H | -6.809573 | 0.312915  | 0.004497  |
| H | -6.802332 | -2.175499 | 0.020969  |
| H | -4.637695 | -3.419318 | 0.023401  |
| H | -2.521039 | -2.190376 | 0.009351  |
| C | -2.177311 | 0.562119  | -0.010169 |
| C | -0.883717 | -0.104640 | -0.007833 |
| C | 0.261472  | 0.624427  | -0.008033 |
| C | 1.617487  | 0.130300  | -0.005424 |
| C | 2.702452  | 1.054305  | 0.003288  |
| C | 1.938427  | -1.236687 | -0.011340 |
| C | 4.018447  | 0.608097  | 0.006101  |
| C | 3.244879  | -1.701165 | -0.008893 |
| H | 1.134269  | -1.970211 | -0.018805 |
| C | 4.289395  | -0.766239 | 0.000079  |
| H | 3.431939  | -2.769559 | -0.014114 |

|   |           |           |           |
|---|-----------|-----------|-----------|
| H | -0.854934 | -1.189771 | -0.004271 |
| H | 0.150054  | 1.705562  | -0.009548 |
| O | -2.245291 | 1.822082  | -0.018932 |
| O | -4.729540 | 1.810970  | -0.011293 |
| H | -3.767197 | 2.117477  | -0.015952 |
| O | 2.368387  | 2.363816  | 0.009002  |
| C | 3.406559  | 3.335563  | 0.019232  |
| H | 4.026303  | 3.239731  | 0.917473  |
| H | 4.033749  | 3.250903  | -0.874968 |
| H | 2.904617  | 4.302853  | 0.023116  |
| O | 5.600549  | -1.093522 | 0.003418  |
| H | 4.861445  | 1.290886  | 0.012880  |
| C | 5.956616  | -2.472301 | -0.003771 |
| H | 7.046028  | -2.495654 | 0.000685  |
| H | 5.574710  | -2.981307 | 0.887593  |
| H | 5.582203  | -2.969947 | -0.904667 |

Neutral

E = -961.085537115 Hartree

Zero-point correction = 0.293376 (Hartree/Particle)

Radical anion optimized at neutral geometry

E = -961.211064259 Hartree

Zero-point correction = 0.290798 (Hartree/Particle)

Ch3 (neutral)

|   |           |           |           |
|---|-----------|-----------|-----------|
| C | -5.689339 | -0.290590 | 0.020579  |
| C | -5.620588 | -1.674293 | -0.006128 |
| C | -4.380339 | -2.328780 | -0.034516 |
| C | -3.215154 | -1.581707 | -0.034680 |
| C | -3.243235 | -0.171057 | -0.007935 |
| C | -4.513338 | 0.471635  | 0.018748  |
| H | -6.645284 | 0.229752  | 0.042311  |
| H | -6.541856 | -2.255784 | -0.005357 |
| H | -4.331809 | -3.415312 | -0.056272 |
| H | -2.263940 | -2.107233 | -0.057957 |
| C | -2.028399 | 0.655931  | -0.006288 |
| C | -0.705042 | 0.035100  | -0.010058 |

|   |           |           |           |
|---|-----------|-----------|-----------|
| C | 0.408530  | 0.803663  | -0.005805 |
| C | 1.786876  | 0.348132  | -0.003435 |
| C | 2.831884  | 1.310220  | -0.006031 |
| C | 2.129964  | -1.010017 | 0.002931  |
| C | 4.160275  | 0.889035  | -0.002233 |
| C | 3.458169  | -1.426723 | 0.006831  |
| H | 1.354879  | -1.774101 | 0.005976  |
| C | 4.477511  | -0.470511 | 0.004207  |
| H | -0.636462 | -1.048401 | -0.013055 |
| H | 0.264606  | 1.880546  | -0.003361 |
| O | -2.137092 | 1.910103  | 0.002126  |
| O | -4.625934 | 1.806218  | 0.043766  |
| H | -3.680602 | 2.154946  | 0.031213  |
| O | 2.454967  | 2.614294  | -0.012595 |
| C | 3.468598  | 3.609260  | -0.015329 |
| H | 4.093889  | 3.539557  | 0.882034  |
| H | 4.097146  | 3.531179  | -0.909717 |
| H | 2.945152  | 4.565310  | -0.020751 |
| H | 4.975548  | 1.605300  | -0.004099 |
| O | 3.663118  | -2.775640 | 0.013617  |
| H | 5.525466  | -0.754823 | 0.007242  |
| C | 5.003585  | -3.242845 | 0.021645  |
| H | 4.941028  | -4.331157 | 0.027564  |
| H | 5.544685  | -2.914278 | -0.873522 |
| H | 5.537336  | -2.904014 | 0.917408  |

Neutral

E = -961.080189305 Hartree

Zero-point correction = 0.293235 (Hartree/Particle)

Radical anion optimized at neutral geometry

E = -961.210086872 Hartree

Zero-point correction = 0.290828 (Hartree/Particle)

-----  
 CH4 (neutral)

|   |          |           |           |
|---|----------|-----------|-----------|
| C | 5.058847 | 0.617830  | -0.040441 |
| C | 5.301771 | -0.748982 | 0.051556  |

|   |           |           |           |
|---|-----------|-----------|-----------|
| C | 4.231826  | -1.667971 | 0.096817  |
| C | 2.937971  | -1.203628 | 0.051074  |
| C | 2.639113  | 0.176124  | -0.041817 |
| C | 3.738699  | 1.080331  | -0.088669 |
| H | 5.854059  | 1.355225  | -0.078231 |
| H | 4.449635  | -2.731142 | 0.167580  |
| H | 2.134398  | -1.934761 | 0.087638  |
| C | 1.282362  | 0.708369  | -0.092127 |
| C | 0.126546  | -0.189432 | -0.034245 |
| C | -1.128057 | 0.307409  | -0.100982 |
| C | -2.368891 | -0.450350 | -0.054271 |
| C | -3.585652 | 0.252741  | -0.130684 |
| C | -2.405444 | -1.855249 | 0.062749  |
| C | -4.816991 | -0.435553 | -0.100183 |
| C | -3.616070 | -2.522786 | 0.110964  |
| H | -1.477960 | -2.420582 | 0.119370  |
| C | -4.826142 | -1.823083 | 0.031093  |
| H | 0.300103  | -1.256794 | 0.063428  |
| H | -1.232663 | 1.384217  | -0.203785 |
| O | 1.104300  | 1.954328  | -0.186097 |
| O | 3.546226  | 2.399875  | -0.179915 |
| H | 2.540807  | 2.519543  | -0.205064 |
| O | -3.572765 | 1.609353  | -0.301592 |
| C | -3.993224 | 2.369816  | 0.838167  |
| H | -5.021703 | 2.122937  | 1.113315  |
| H | -3.321501 | 2.186378  | 1.684510  |
| H | -3.931065 | 3.418033  | 0.542837  |
| O | 6.534268  | -1.294255 | 0.103155  |
| C | 7.665097  | -0.429211 | 0.066673  |
| H | 8.537240  | -1.079923 | 0.122427  |
| H | 7.690714  | 0.142134  | -0.867342 |
| H | 7.661029  | 0.255864  | 0.921125  |
| H | -3.637039 | -3.606862 | 0.206687  |
| H | -5.760992 | -2.374463 | 0.060438  |
| O | -5.925227 | 0.337019  | -0.219231 |
| C | -7.192477 | -0.301873 | -0.141301 |
| H | -7.320542 | -0.808167 | 0.822200  |
| H | -7.931581 | 0.493345  | -0.237399 |



H -7.323067 -1.022553 -0.956542

Neutral

E = -1075.89511811 Hartree

Zero-point correction = 0.325836 (Hartree/Particle)

Radical anion optimized at neutral geometry

E = -1076.02152935 Hartree

Zero-point correction = 0.324317 (Hartree/Particle)

-----  
Ch5 (neutral)

|   |           |           |           |
|---|-----------|-----------|-----------|
| C | 5.149155  | 0.461199  | -0.004600 |
| C | 5.296402  | -0.921786 | 0.014845  |
| C | 4.164853  | -1.763764 | 0.023848  |
| C | 2.906222  | -1.206796 | 0.012860  |
| C | 2.704107  | 0.192444  | -0.007303 |
| C | 3.864152  | 1.017425  | -0.015274 |
| H | 5.993790  | 1.142516  | -0.011709 |
| H | 4.306326  | -2.842045 | 0.039343  |
| H | 2.053170  | -1.880403 | 0.020611  |
| C | 1.384591  | 0.822103  | -0.018878 |
| C | 0.174932  | 0.011416  | -0.013822 |
| C | -1.048452 | 0.598617  | -0.011332 |
| C | -2.333782 | -0.058925 | -0.008732 |
| C | -3.521467 | 0.717463  | 0.009073  |
| C | -2.481660 | -1.460763 | -0.025045 |
| C | -4.782126 | 0.113210  | 0.009694  |
| C | -3.717103 | -2.074285 | -0.024525 |
| H | -1.592288 | -2.087974 | -0.039943 |
| C | -4.875513 | -1.280703 | -0.007318 |
| H | 0.273905  | -1.069766 | -0.010855 |
| H | -1.068150 | 1.685247  | -0.010815 |
| O | 1.304218  | 2.085391  | -0.033292 |
| O | 3.764451  | 2.350785  | -0.032995 |
| H | 2.765953  | 2.536794  | -0.036704 |
| O | -3.360420 | 2.059264  | 0.025945  |
| C | -4.511548 | 2.894163  | 0.044735  |
| H | -5.124274 | 2.741516  | -0.850540 |

|   |           |           |           |
|---|-----------|-----------|-----------|
| H | -5.112127 | 2.717650  | 0.943853  |
| H | -4.132905 | 3.915987  | 0.055800  |
| H | -5.675852 | 0.720745  | 0.023310  |
| O | 6.489691  | -1.553192 | 0.026619  |
| C | 7.675928  | -0.765696 | 0.017553  |
| H | 8.502669  | -1.475407 | 0.029131  |
| H | 7.731086  | -0.150929 | -0.887255 |
| H | 7.727905  | -0.125356 | 0.904653  |
| H | -3.813495 | -3.157673 | -0.037974 |
| O | -6.048645 | -1.951218 | -0.008776 |
| C | -7.262644 | -1.208712 | 0.006988  |
| H | -7.346980 | -0.573981 | -0.881999 |
| H | -8.062282 | -1.948944 | 0.002404  |
| H | -7.337093 | -0.595887 | 0.912073  |

Neutral

E = -1075.90563962 Hartree

Zero-point correction = 0.326160 (Hartree/Particle)

Radical anion optimized at neutral geometry

E = -1076.02826638 Hartree

Zero-point correction = 0.324403 (Hartree/Particle)

-----  
Ch6 (neutral)

|   |           |           |           |
|---|-----------|-----------|-----------|
| C | 4.950705  | -0.410956 | -0.056834 |
| C | 5.016778  | 0.969116  | 0.106553  |
| C | 3.837809  | 1.739072  | 0.199699  |
| C | 2.614049  | 1.115022  | 0.128695  |
| C | 2.494313  | -0.284831 | -0.035995 |
| C | 3.700528  | -1.036718 | -0.126684 |
| H | 5.833538  | -1.037184 | -0.132725 |
| H | 3.917813  | 2.816057  | 0.326768  |
| H | 1.723193  | 1.733066  | 0.204133  |
| C | 1.216443  | -0.983943 | -0.115837 |
| C | -0.043499 | -0.243829 | -0.038923 |
| C | -1.225526 | -0.898694 | -0.082232 |
| C | -2.551489 | -0.307123 | -0.031429 |

|   |           |           |           |
|---|-----------|-----------|-----------|
| C | -3.684128 | -1.155631 | 0.085679  |
| C | -2.758191 | 1.075646  | -0.104863 |
| C | -4.962049 | -0.601728 | 0.127416  |
| C | -4.037051 | 1.625408  | -0.061652 |
| H | -1.912132 | 1.752181  | -0.210720 |
| C | -5.143816 | 0.780782  | 0.054875  |
| H | -0.009262 | 0.837354  | 0.058931  |
| H | -1.188655 | -1.981937 | -0.157688 |
| O | 1.200915  | -2.239358 | -0.251822 |
| O | 3.678250  | -2.364042 | -0.280294 |
| H | 2.695480  | -2.609878 | -0.299120 |
| O | -3.437163 | -2.489221 | 0.160037  |
| C | -4.543493 | -3.374034 | 0.260615  |
| H | -5.116192 | -3.187918 | 1.176347  |
| H | -5.202652 | -3.285003 | -0.610529 |
| H | -4.118783 | -4.377307 | 0.294698  |
| H | -5.842007 | -1.230044 | 0.218195  |
| O | -4.108086 | 2.985415  | -0.144758 |
| H | -6.156655 | 1.170086  | 0.089092  |
| C | -5.394539 | 3.584435  | -0.119247 |
| H | -5.226665 | 4.658462  | -0.201114 |
| H | -6.007509 | 3.246647  | -0.963300 |
| H | -5.915692 | 3.368635  | 0.821042  |
| O | 6.169544  | 1.664737  | 0.188251  |
| C | 7.401457  | 0.955422  | 0.103696  |
| H | 8.183716  | 1.708390  | 0.194909  |
| H | 7.491855  | 0.229690  | 0.918967  |
| H | 7.493130  | 0.443980  | -0.860394 |

Neutral

E = -1075.90101389 Hartree

Zero-point correction = 0.325902 (Hartree/Particle)

Radical anion optimized at neutral geometry

E = -1076.02780693 Hartree

Zero-point correction = 0.324611 (Hartree/Particle)

-----

## Radical anion species

### Ch1(radical)

|   |           |           |           |
|---|-----------|-----------|-----------|
| C | -5.859494 | -0.202452 | -0.024688 |
| C | -6.035204 | 1.169347  | 0.132578  |
| C | -4.918474 | 2.008832  | 0.221455  |
| C | -3.640151 | 1.467331  | 0.151602  |
| C | -3.420385 | 0.083575  | -0.008939 |
| C | -4.573868 | -0.753249 | -0.095647 |
| H | -6.713704 | -0.874550 | -0.095323 |
| H | -7.040964 | 1.583574  | 0.186498  |
| H | -5.045106 | 3.082754  | 0.345710  |
| H | -2.789658 | 2.141447  | 0.226158  |
| C | -2.086783 | -0.538846 | -0.089920 |
| C | -0.900051 | 0.224411  | -0.035647 |
| C | 0.370200  | -0.331389 | -0.102611 |
| C | 1.614843  | 0.390194  | -0.067551 |
| C | 2.838997  | -0.319484 | -0.136884 |
| C | 1.698793  | 1.804423  | 0.029287  |
| C | 4.077540  | 0.342886  | -0.116340 |
| C | 2.922810  | 2.449388  | 0.060266  |
| H | 0.786981  | 2.394658  | 0.082231  |
| C | 4.127014  | 1.735931  | -0.011017 |
| H | 2.957742  | 3.535244  | 0.138154  |
| H | 5.072115  | 2.268189  | 0.009283  |
| H | -1.002733 | 1.300844  | 0.059823  |
| H | 0.438880  | -1.410906 | -0.193441 |
| O | -2.040520 | -1.847256 | -0.219919 |
| O | -4.431232 | -2.083048 | -0.246612 |
| H | -3.365721 | -2.191660 | -0.257671 |
| O | 2.817781  | -1.688626 | -0.283644 |
| O | 5.176593  | -0.458764 | -0.209314 |
| C | 3.104813  | -2.407642 | 0.915982  |
| H | 4.110228  | -2.172638 | 1.279436  |
| H | 2.364440  | -2.173870 | 1.690494  |
| H | 3.045314  | -3.468808 | 0.665983  |
| C | 6.451543  | 0.160688  | -0.158524 |
| H | 6.591008  | 0.856498  | -0.994229 |

|   |          |           |           |
|---|----------|-----------|-----------|
| H | 6.597661 | 0.694449  | 0.787958  |
| H | 7.179694 | -0.647346 | -0.235569 |

Radical

E = -961.210490049 Hartree

Zero-point correction = 0.290270 (Hartree/Particle)

Neutral optimized at radical anion geometry

E = -961.064295450 Hartree

Zero-point correction = 0.292213 (Hartree/Particle)

-----  
Ch2(radical)

|   |           |           |           |
|---|-----------|-----------|-----------|
| C | 5.879911  | -0.265481 | -0.002395 |
| C | 5.869699  | -1.657979 | -0.005280 |
| C | 4.649821  | -2.344595 | -0.004760 |
| C | 3.455860  | -1.632301 | -0.001670 |
| C | 3.424049  | -0.222030 | 0.000776  |
| C | 4.680799  | 0.457755  | 0.000835  |
| H | 6.817060  | 0.289717  | -0.002500 |
| H | 6.810541  | -2.206439 | -0.007758 |
| H | 4.630381  | -3.432963 | -0.006533 |
| H | 2.521923  | -2.190301 | -0.000864 |
| C | 2.188102  | 0.578141  | 0.003678  |
| C | 0.907985  | -0.014681 | -0.000338 |
| C | -0.273145 | 0.716864  | 0.001122  |
| C | -1.609011 | 0.180888  | -0.000099 |
| C | -2.737205 | 1.059786  | -0.002350 |
| C | -1.905637 | -1.196490 | 0.001813  |
| C | -4.037975 | 0.576438  | -0.002476 |
| C | -3.206702 | -1.700259 | 0.001723  |
| H | -1.085487 | -1.911313 | 0.004144  |
| C | -4.277382 | -0.807061 | -0.000311 |
| H | -3.358218 | -2.774873 | 0.003620  |
| H | 0.860404  | -1.099416 | -0.004991 |
| H | -0.183914 | 1.798178  | 0.003842  |
| O | 2.322589  | 1.891147  | 0.010144  |
| O | 4.716337  | 1.802907  | 0.003995  |

|   |           |           |           |
|---|-----------|-----------|-----------|
| H | 3.664684  | 2.050273  | 0.007479  |
| O | -2.445691 | 2.390931  | -0.004296 |
| C | -3.519763 | 3.316186  | -0.005710 |
| H | -4.143068 | 3.201572  | -0.900513 |
| H | -4.143289 | 3.204068  | 0.889258  |
| H | -3.061983 | 4.305876  | -0.007045 |
| O | -5.595172 | -1.170001 | 0.000045  |
| H | -4.897102 | 1.239131  | -0.004079 |
| C | -5.895719 | -2.556188 | 0.004046  |
| H | -6.983691 | -2.628467 | 0.003933  |
| H | -5.497175 | -3.052111 | -0.889003 |
| H | -5.497686 | -3.046748 | 0.900280  |

#### Radical

E = -961.217301360 Hartree

Zero-point correction = 0.290165 (Hartree/Particle)

Neutral optimized at radical anion geometry

E = -961.076649259 Hartree

Zero-point correction = 0.292216 (Hartree/Particle)

-----

#### Ch3(radical)

|   |           |           |           |
|---|-----------|-----------|-----------|
| C | -5.691942 | 0.274671  | 0.001964  |
| C | -5.643924 | 1.665468  | -0.008216 |
| C | -4.406449 | 2.319964  | -0.014783 |
| C | -3.232337 | 1.575985  | -0.011114 |
| C | -3.238791 | 0.166219  | -0.000677 |
| C | -4.511886 | -0.479775 | 0.005664  |
| H | -6.643374 | -0.255495 | 0.007079  |
| H | -6.569804 | 2.238871  | -0.011112 |
| H | -4.358288 | 3.407326  | -0.022846 |
| H | -2.284108 | 2.108951  | -0.016732 |
| C | -2.022219 | -0.666820 | 0.003801  |
| C | -0.727315 | -0.105592 | -0.000884 |
| C | 0.431553  | -0.872489 | 0.000279  |
| C | 1.781102  | -0.378433 | -0.000823 |
| C | 2.877838  | -1.296637 | -0.003204 |

|   |           |           |           |
|---|-----------|-----------|-----------|
| C | 2.104861  | 0.993893  | 0.001218  |
| C | 4.187103  | -0.839892 | -0.003302 |
| C | 3.423684  | 1.446737  | 0.001115  |
| H | 1.314039  | 1.740700  | 0.003839  |
| C | 4.478794  | 0.535037  | -0.001102 |
| H | -0.649254 | 0.977172  | -0.005648 |
| H | 0.309952  | -1.950436 | 0.002776  |
| O | -2.189388 | -1.971375 | 0.012230  |
| O | -4.585875 | -1.823301 | 0.015074  |
| H | -3.550791 | -2.101410 | 0.014871  |
| O | 2.541120  | -2.623312 | -0.005248 |
| C | 3.590492  | -3.573814 | -0.011062 |
| H | 4.216156  | -3.473742 | -0.906618 |
| H | 4.220325  | -3.480385 | 0.882297  |
| H | 3.109879  | -4.552888 | -0.013484 |
| H | 5.019025  | -1.536907 | -0.005060 |
| O | 3.582842  | 2.809436  | 0.003349  |
| H | 5.516621  | 0.850748  | -0.001175 |
| C | 4.905500  | 3.317327  | 0.012045  |
| H | 4.812033  | 4.403908  | 0.016363  |
| H | 5.451328  | 2.996393  | 0.907685  |
| H | 5.460275  | 3.004511  | -0.880983 |

Radical

E = -961.216248368 Hartree

Zero-point correction = 0.290494 (Hartree/Particle)

Neutral optimized at radical anion geometry

E = -961.070599213 Hartree

Zero-point correction = 0.292367 (Hartree/Particle)

-----  
Ch4(radical)

|   |          |           |           |
|---|----------|-----------|-----------|
| C | 5.072955 | 0.592649  | -0.046673 |
| C | 5.317952 | -0.773326 | 0.067381  |
| C | 4.246904 | -1.679525 | 0.126677  |
| C | 2.947427 | -1.204413 | 0.071638  |
| C | 2.645867 | 0.168082  | -0.043594 |
| C | 3.751801 | 1.064418  | -0.102882 |

|   |           |           |           |
|---|-----------|-----------|-----------|
| H | 5.871418  | 1.326469  | -0.095447 |
| H | 4.452666  | -2.744115 | 0.215369  |
| H | 2.139834  | -1.931671 | 0.120386  |
| C | 1.282752  | 0.720153  | -0.106368 |
| C | 0.135769  | -0.095783 | -0.050627 |
| C | -1.163143 | 0.399057  | -0.109722 |
| C | -2.368916 | -0.381887 | -0.068321 |
| C | -3.629080 | 0.263548  | -0.141672 |
| C | -2.382524 | -1.798551 | 0.041451  |
| C | -4.831886 | -0.460468 | -0.115352 |
| C | -3.572275 | -2.504133 | 0.080154  |
| H | -1.442292 | -2.341707 | 0.100897  |
| C | -4.811533 | -1.853767 | 0.003550  |
| H | 0.291465  | -1.166378 | 0.040163  |
| H | -1.284352 | 1.473921  | -0.200617 |
| O | 1.176100  | 2.029849  | -0.220503 |
| O | 3.538547  | 2.383531  | -0.214281 |
| H | 2.447493  | 2.426807  | -0.234871 |
| O | -3.677823 | 1.631726  | -0.295760 |
| C | -4.000847 | 2.338851  | 0.902040  |
| H | -4.994242 | 2.056092  | 1.264339  |
| H | -3.250784 | 2.143117  | 1.677767  |
| H | -3.992679 | 3.401146  | 0.649634  |
| O | 6.565044  | -1.322965 | 0.128569  |
| C | 7.682151  | -0.449365 | 0.077449  |
| H | 8.564842  | -1.086107 | 0.142099  |
| H | 7.704865  | 0.111646  | -0.864132 |
| H | 7.675711  | 0.252618  | 0.919445  |
| H | -3.551725 | -3.589562 | 0.169080  |
| H | -5.728648 | -2.432688 | 0.029548  |
| O | -5.970493 | 0.283300  | -0.218796 |
| C | -7.211558 | -0.394243 | -0.106539 |
| H | -7.299413 | -0.906258 | 0.858939  |
| H | -7.980151 | 0.375711  | -0.180994 |
| H | -7.345917 | -1.120360 | -0.917000 |

Radical

E = -1076.02898969 Hartree



Zero-point correction = 0.322175 (Hartree/Particle)

Neutral optimized at radical anion geometry

E = -1075.88564462 Hartree

Zero-point correction = 0.324024 (Hartree/Particle)

---

Ch5(radical)

|   |           |           |           |
|---|-----------|-----------|-----------|
| C | 5.166160  | 0.451297  | -0.010395 |
| C | 5.323925  | -0.929120 | 0.009541  |
| C | 4.199701  | -1.773582 | 0.026786  |
| C | 2.934599  | -1.212362 | 0.022744  |
| C | 2.719563  | 0.181737  | 0.001519  |
| C | 3.876730  | 1.037647  | -0.014085 |
| H | 6.013717  | 1.129636  | -0.023272 |
| H | 4.338684  | -2.852231 | 0.043448  |
| H | 2.081054  | -1.887396 | 0.037401  |
| C | 1.391773  | 0.783916  | -0.004340 |
| C | 0.187619  | 0.072337  | 0.003435  |
| C | -1.070510 | 0.671168  | 0.002613  |
| C | -2.334156 | -0.014765 | 0.000548  |
| C | -3.553852 | 0.721151  | 0.008569  |
| C | -2.465917 | -1.422923 | -0.011620 |
| C | -4.798965 | 0.090990  | 0.004222  |
| C | -3.694627 | -2.064836 | -0.015753 |
| H | -1.567708 | -2.036722 | -0.019142 |
| C | -4.869572 | -1.307512 | -0.008122 |
| H | 0.261494  | -1.010712 | 0.008886  |
| H | -1.108397 | 1.755170  | 0.002319  |
| O | 1.343218  | 2.132555  | -0.018270 |
| O | 3.748469  | 2.345954  | -0.031727 |
| H | 2.361838  | 2.429868  | -0.024569 |
| O | -3.424488 | 2.078020  | 0.020889  |
| C | -4.597769 | 2.873800  | 0.028262  |
| H | -5.203432 | 2.700343  | -0.869205 |
| H | -5.203375 | 2.684047  | 0.922476  |
| H | -4.255709 | 3.909137  | 0.037773  |
| H | -5.704192 | 0.682479  | 0.010726  |

|   |           |           |           |
|---|-----------|-----------|-----------|
| O | 6.535863  | -1.560706 | 0.014756  |
| C | 7.704538  | -0.756978 | -0.004529 |
| H | 8.546582  | -1.449848 | 0.000512  |
| H | 7.746551  | -0.137908 | -0.908396 |
| H | 7.757792  | -0.111277 | 0.879930  |
| H | -3.759441 | -3.151126 | -0.025832 |
| O | -6.042952 | -2.006811 | -0.013262 |
| C | -7.258522 | -1.276285 | -0.010045 |
| H | -7.344666 | -0.641455 | -0.900085 |
| H | -8.055936 | -2.019845 | -0.019427 |
| H | -7.350039 | -0.658330 | 0.891268  |

Radical

E = -1076.03566938 Hartree

Zero-point correction = 0.323405 (Hartree/Particle)

Neutral optimized at radical anion geometry

E = -1075.89308990 Hartree

Zero-point correction = 0.324933 (Hartree/Particle)

Ch6(radical)

|   |           |           |           |
|---|-----------|-----------|-----------|
| C | -4.958015 | -0.426370 | -0.017587 |
| C | -5.046467 | 0.959267  | 0.029310  |
| C | -3.881833 | 1.748492  | 0.051421  |
| C | -2.646313 | 1.127443  | 0.028271  |
| C | -2.501628 | -0.274830 | -0.021725 |
| C | -3.698311 | -1.073120 | -0.045552 |
| H | -5.838317 | -1.061622 | -0.035124 |
| H | -3.968764 | 2.832052  | 0.089771  |
| H | -1.760776 | 1.759677  | 0.050947  |
| C | -1.206271 | -0.943456 | -0.036664 |
| C | 0.031428  | -0.290852 | -0.025819 |
| C | 1.256873  | -0.953521 | -0.017381 |
| C | 2.552145  | -0.333023 | -0.006897 |
| C | 3.731364  | -1.141982 | 0.023984  |
| C | 2.741931  | 1.063915  | -0.025252 |
| C | 4.990494  | -0.560773 | 0.031242  |

|   |           |           |           |
|---|-----------|-----------|-----------|
| C | 4.010736  | 1.641757  | -0.017156 |
| H | 1.883324  | 1.731514  | -0.048365 |
| C | 5.148200  | 0.835225  | 0.009653  |
| H | 0.012175  | 0.794298  | -0.019339 |
| H | 1.240989  | -2.037870 | -0.014864 |
| O | -1.226978 | -2.288347 | -0.052887 |
| O | -3.631459 | -2.385327 | -0.091717 |
| H | -2.266427 | -2.534791 | -0.073763 |
| O | 3.523793  | -2.494255 | 0.045429  |
| C | 4.660787  | -3.338169 | 0.079731  |
| H | 5.289579  | -3.198102 | -0.808038 |
| H | 5.261499  | -3.162259 | 0.980475  |
| H | 4.277294  | -4.359040 | 0.093991  |
| H | 5.886115  | -1.173385 | 0.053618  |
| O | 4.039280  | 3.012806  | -0.037235 |
| H | 6.151190  | 1.248479  | 0.015832  |
| C | 5.308292  | 3.643472  | -0.031585 |
| H | 5.112552  | 4.716166  | -0.050373 |
| H | 5.875033  | 3.393940  | 0.873720  |
| H | 5.896581  | 3.366442  | -0.914872 |
| O | -6.224084 | 1.649132  | 0.061495  |
| C | -7.432556 | 0.905987  | 0.041271  |
| H | -8.237950 | 1.640375  | 0.072384  |
| H | -7.516429 | 0.310096  | -0.874998 |
| H | -7.507199 | 0.245194  | 0.912736  |

Radical

E = -1076.03528311 Hartree

Zero-point correction = 0.323024 (Hartree/Particle)

Neutral optimized at radical anion geometry

E = -1075.88698444 Hartree

Zero-point correction = 0.324404 (Hartree/Particle)

-----
